# Supplementary material for: Coupled-cluster treatment of complex open-shell systems: the case of single-molecule magnets
Source: PubMed Central journal article supplement (PMC11186456; doi:10.1039/d4cp01129e), 2024-05-27
Supplement: CP-026-D4CP01129E-s001.pdf [file CP-026-D4CP01129E-s001.pdf]

# Coupled-Cluster Treatment of Complex Open-Shell Systems: The Case of Single-Molecule Magnets

Maristella Alessio,<sup>a,b,\*</sup> Garrette Pauley Paran,<sup>a</sup> Cansu Utku,<sup>a</sup> Andreas Grüneis<sup>b</sup> and Thomas-C. Jagau<sup>a</sup>

<sup>a</sup>Department of Chemistry, KU Leuven, Celestijnenlaan 200F, B-3001 Leuven, Belgium

<sup>b</sup>Institute for Theoretical Physics, TU Wien, Wiedner Hauptstraße 8-10/136, 1040 Vienna, Austria

\* Corresponding author: maristella.alessio@kuleuven.be

## Contents

|   |                                            |     |
|---|--------------------------------------------|-----|
| 1 | Spin density                               | S2  |
| 2 | Wave function analysis of Fe-based systems | S3  |
| 3 | Additional CC2 results                     | S6  |
| 4 | Wave function analysis of Co-based systems | S7  |
| 5 | Effects of the low-level DFT method        | S10 |
| 6 | Basis set effects                          | S12 |
| 7 | Comparison with additional benchmark data  | S14 |

# 1 Spin density

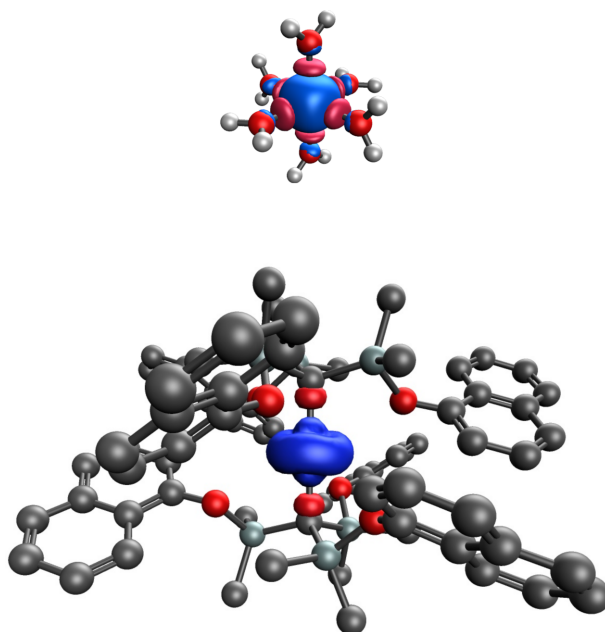

Figure S1: Spin density of  $[\text{Fe}(\text{H}_2\text{O})_6]^{3+}$  (top) and  $\text{Co}(\text{C}(\text{SiMe}_2\text{ONaph})_3)_2$  (bottom) (UHF/cc-pVTZ). For  $\text{Co}(\text{C}(\text{SiMe}_2\text{ONaph})_3)_2$ , the hydrogen atoms have been omitted. An isovalue of 0.075 was used.

## 2 Wave function analysis of Fe-based systems

Table S1: EOM-EA-CCSD and EOM-EA-CCSD-in-LRC- $\omega$ PBEh/cc-pVTZ wave function properties of the five lowest eigenstates of  $[\text{Fe}(\text{H}_2\text{O})_6]^{2+}$ . Energies are in  $\text{cm}^{-1}$ . EOM-EA-CCSD-in-LRC- $\omega$ PBEh/cc-pVTZ energies are obtained without truncation of the virtual space. Effective numbers of unpaired electrons ( $n_{\text{u,nl}}$ ) are computed using Head-Gordon's formula.[1]

| EOM-EA-CCSD |       |       |       |
|-------------|-------|-------|-------|
| $ 1\rangle$ | 0     | 4.008 | 6.004 |
| $ 1\rangle$ | 0     | 4.008 | 6.004 |
| $ 2\rangle$ | 6     | 4.008 | 6.004 |
| $ 3\rangle$ | 12    | 4.008 | 6.004 |
| $ 4\rangle$ | 10905 | 4.929 | 6.004 |
| $ 5\rangle$ | 10919 | 4.018 | 6.004 |

  

| EOM-EA-CCSD-in-LRC- $\omega$ PBEh |       |                   |                       |
|-----------------------------------|-------|-------------------|-----------------------|
| State                             | $E$   | $n_{\text{u,nl}}$ | $\langle S^2 \rangle$ |
| $ 1\rangle$                       | 0     | 4.006             | 6.074                 |
| $ 2\rangle$                       | 7     | 4.006             | 6.074                 |
| $ 3\rangle$                       | 13    | 4.006             | 6.074                 |
| $ 4\rangle$                       | 11362 | 4.014             | 6.185                 |
| $ 5\rangle$                       | 11378 | 4.014             | 6.185                 |

Table S2: EOM-SF-CCSD and EOM-SF-CCSD-in-LRC- $\omega$ PBEh/cc-pVTZ wave function properties of the four lowest eigenstates of  $[\text{Fe}(\text{H}_2\text{O})_6]^{3+}$ . Energies are in  $\text{cm}^{-1}$ . EOM-SF-CCSD-in-LRC- $\omega$ PBEh energies are obtained without truncation of the virtual space. Effective numbers of unpaired electrons ( $n_{\text{u,nl}}$ ) are computed using Head-Gordon's formula.[1]

| EOM-SF-CCSD |       |                   |                       |
|-------------|-------|-------------------|-----------------------|
| State       | $E$   | $n_{\text{u,nl}}$ | $\langle S^2 \rangle$ |
| $ 1\rangle$ | 0     | 5.002             | 8.752                 |
| $ 2\rangle$ | 20314 | 3.017             | 3.771                 |
| $ 3\rangle$ | 20314 | 3.017             | 3.771                 |
| $ 4\rangle$ | 20314 | 3.017             | 3.771                 |

  

| EOM-SF-CCSD-in-LRC- $\omega$ PBEh |       |                   |                       |
|-----------------------------------|-------|-------------------|-----------------------|
| State                             | $E$   | $n_{\text{u,nl}}$ | $\langle S^2 \rangle$ |
| $ 1\rangle$                       | 0     | 5.003             | 8.203                 |
| $ 2\rangle$                       | 27218 | 3.486             | 3.821                 |
| $ 3\rangle$                       | 27218 | 3.217             | 3.821                 |
| $ 4\rangle$                       | 27218 | 3.483             | 3.821                 |

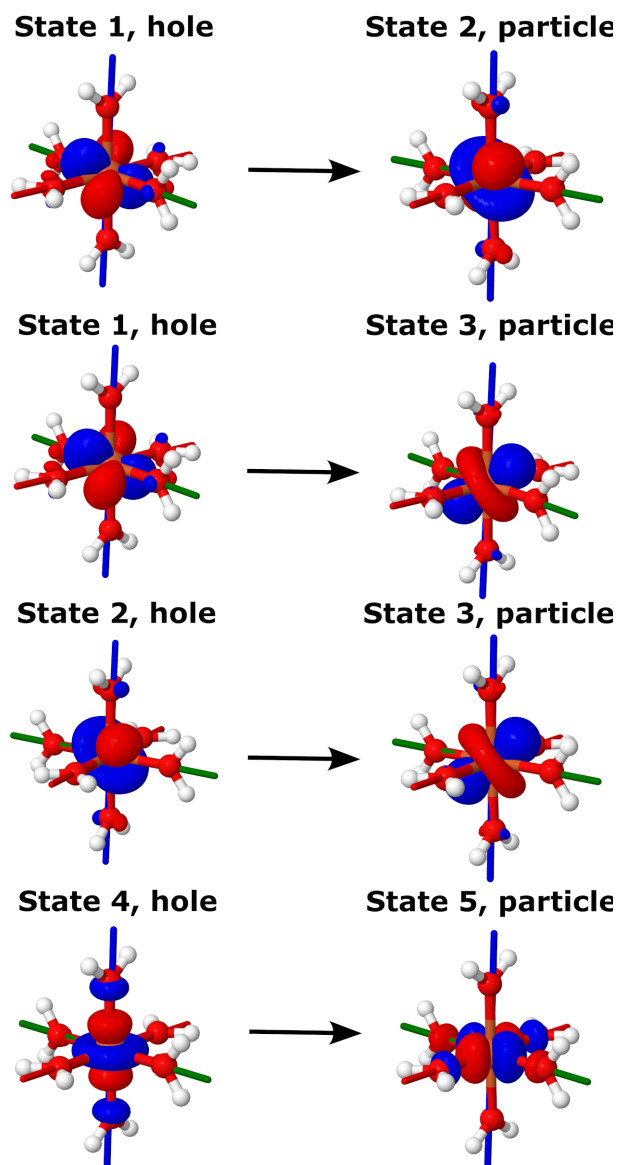

Figure S2: Hole and particle NTOs of the density matrix between states  $|1\rangle$  and  $|2\rangle$ ,  $|1\rangle$  and  $|3\rangle$ ,  $|2\rangle$  and  $|3\rangle$ , and  $|4\rangle$  and  $|5\rangle$  (from top to bottom) of  $[\text{Fe}(\text{H}_2\text{O})_6]^{2+}$  computed with EOM-EA-CCSD-in-LRC- $\omega$ PBEh/cc-pVTZ. Red, green, and blue axes indicate  $x$ ,  $y$ , and  $z$  axes. An isovalue of 0.05 was used.

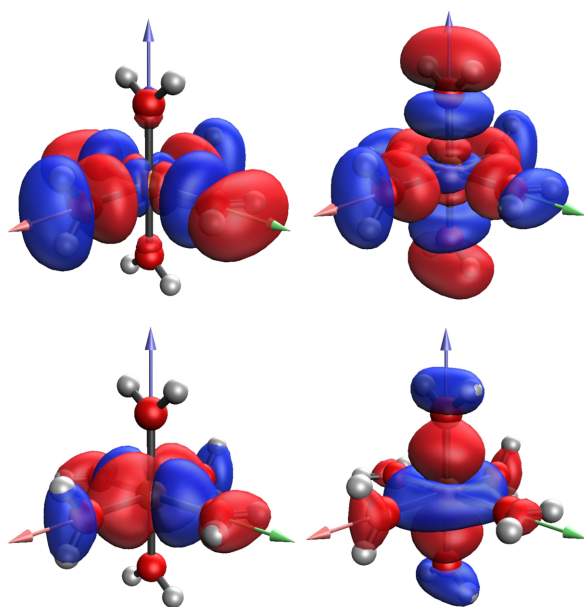

Figure S3: Anti-bonding (top) and bonding (bottom) HF/cc-pVTZ orbitals of  $[\text{Fe}(\text{H}_2\text{O})_6]^{3+}$ , which result from the combination of the lone pair orbitals of water with the  $d_{z^2}$  and  $d_{x^2-y^2}$  orbitals of  $\text{Fe}^{3+}$ . Red, green, and blue axes indicate  $x$ ,  $y$ , and  $z$  axes. An isovalue of 0.05 was used.

### 3 Additional CC2 results

Table S3: Calculated CC2/cc-pVTZ excitation energy  $\Delta E$  (eV) of  $[\text{Fe}(\text{H}_2\text{O})_6]^{2+}$  and  $[\text{Fe}(\text{H}_2\text{O})_6]^{3+}$ , using Cholesky decomposition (CD) and the resolution-of-identity (RI) approximation. For  $[\text{Fe}(\text{H}_2\text{O})_6]^{2+}$ , excitation energies are computed from states  $|1\rangle, |2\rangle, |3\rangle$  to states  $|4\rangle, |5\rangle$ . For  $[\text{Fe}(\text{H}_2\text{O})_6]^{3+}$ , excitation energies are computed from state  $|1\rangle$  to states  $|2\rangle, |3\rangle, |4\rangle$ .

| $[\text{Fe}(\text{H}_2\text{O})_6]^{2+}$ |        |           |           |               |
|------------------------------------------|--------|-----------|-----------|---------------|
|                                          | EA-CC2 | EA-CD-CC2 | EA-RI-CC2 | EA-RI-SCS-CC2 |
| $\Delta E$                               | 1.49   | 1.49      | 1.49      | 1.32          |

  

| $[\text{Fe}(\text{H}_2\text{O})_6]^{3+}$ |        |           |           |
|------------------------------------------|--------|-----------|-----------|
|                                          | SF-CC2 | SF-CD-CC2 | SF-RI-CC2 |
| $\Delta E$                               | 2.49   | 2.48      | 2.49      |

## 4 Wave function analysis of Co-based systems

Table S4: EOM-EE-CCSD and EOM-EE-CCSD-in-LRC- $\omega$ PBEh/cc-pVTZ wave function properties of the reference and target states of  $\text{Co}(\text{C}(\text{SiH}_3)_3)_2$ . Energies are in  $\text{cm}^{-1}$ . EOM-EE-CCSD-in-LRC- $\omega$ PBEh/cc-pVTZ energies are obtained without truncation of the virtual space. Effective numbers of unpaired electrons ( $n_{\text{u,nl}}$ ) are computed using Head-Gordon's formula.[1]

| State              | EOM-CCSD |                   |                       |
|--------------------|----------|-------------------|-----------------------|
|                    | $E$      | $n_{\text{u,nl}}$ | $\langle S^2 \rangle$ |
| 1⟩                 | 0        | 3.332             | 3.756                 |
| 2⟩                 | 11       | 3.333             | 3.756                 |
| 3⟩                 | 803      | 3.010             | 3.758                 |
| 4⟩                 | 803      | 3.010             | 3.758                 |
| 3'⟩                | 1855     | 3.275             | 3.757                 |
| 4'⟩                | 1855     | 3.275             | 3.757                 |
| 5'⟩                | 15609    | 3.111             | 3.763                 |
| 6'⟩                | 15609    | 3.111             | 3.763                 |
| Ref <sub>1</sub> ⟩ | 3903     | 3.329             | 3.754                 |
| Ref <sub>2</sub> ⟩ | 4427     | 3.336             | 3.754                 |

  

| State              | EOM-CCSD-in-LRC- $\omega$ PBEh |                   |                       |
|--------------------|--------------------------------|-------------------|-----------------------|
|                    | $E$                            | $n_{\text{u,nl}}$ | $\langle S^2 \rangle$ |
| 1⟩                 | 0                              | 3.290             | 3.813                 |
| 2⟩                 | 39                             | 3.290             | 3.812                 |
| 3⟩                 | 3287                           | 3.008             | 3.924                 |
| 4⟩                 | 3288                           | 3.008             | 3.924                 |
| 3'⟩                | 3184                           | 3.279             | 3.769                 |
| 4'⟩                | 3184                           | 3.279             | 3.769                 |
| 5'⟩                | 19384                          | 3.054             | 3.841                 |
| 6'⟩                | 19384                          | 3.054             | 3.841                 |
| Ref <sub>1</sub> ⟩ | 1089                           | 3.012             | 3.753                 |
| Ref <sub>2</sub> ⟩ | 4964                           | 3.017             | 3.751                 |

Table S5: Occupations of frontiers natural orbitals  $n_\beta$  and  $n_\alpha$  of the reference ( $|\text{Ref}_1\rangle$  and  $|\text{Ref}_2\rangle$ ) and doubly-degenerate ground state ( $|1\rangle$  and  $|2\rangle$ ) of  $\text{Co}(\text{C}(\text{SiH}_3)_3)_2$  (EOM-EE-CCSD-in-LRC- $\omega$ PBEh/cc-pVTZ).

|                        |          |               |          |          |           |
|------------------------|----------|---------------|----------|----------|-----------|
| $ 1\rangle$            | $d_{xy}$ | $d_{x^2-y^2}$ | $d_{xz}$ | $d_{yz}$ | $d_{z^2}$ |
| $n_\alpha$             | 1.00     | 1.00          | 1.00     | 1.00     | 1.00      |
| $n_\beta$              | 0.50     | 0.50          | 0.49     | 0.49     |           |
| $ 2\rangle$            | $d_{xy}$ | $d_{x^2-y^2}$ | $d_{xz}$ | $d_{yz}$ | $d_{z^2}$ |
| $n_\alpha$             | 1.00     | 1.00          | 1.00     | 1.00     | 1.00      |
| $n_\beta$              | 0.50     | 0.50          | 0.49     | 0.49     |           |
| $ \text{Ref}_1\rangle$ | $d_{xy}$ | $d_{x^2-y^2}$ | $d_{xz}$ | $d_{yz}$ | $d_{z^2}$ |
| $n_\alpha$             | 0.99     | 0.99          | 0.99     | 0.99     | 0.99      |
| $n_\beta$              | 0.97     | 0.97          |          |          |           |
| $ \text{Ref}_2\rangle$ | $d_{xy}$ | $d_{x^2-y^2}$ | $d_{xz}$ | $d_{yz}$ | $d_{z^2}$ |
| $n_\alpha$             | 0.99     | 0.99          | 0.99     | 0.99     | 0.99      |
| $n_\beta$              |          |               | 0.96     | 0.96     |           |



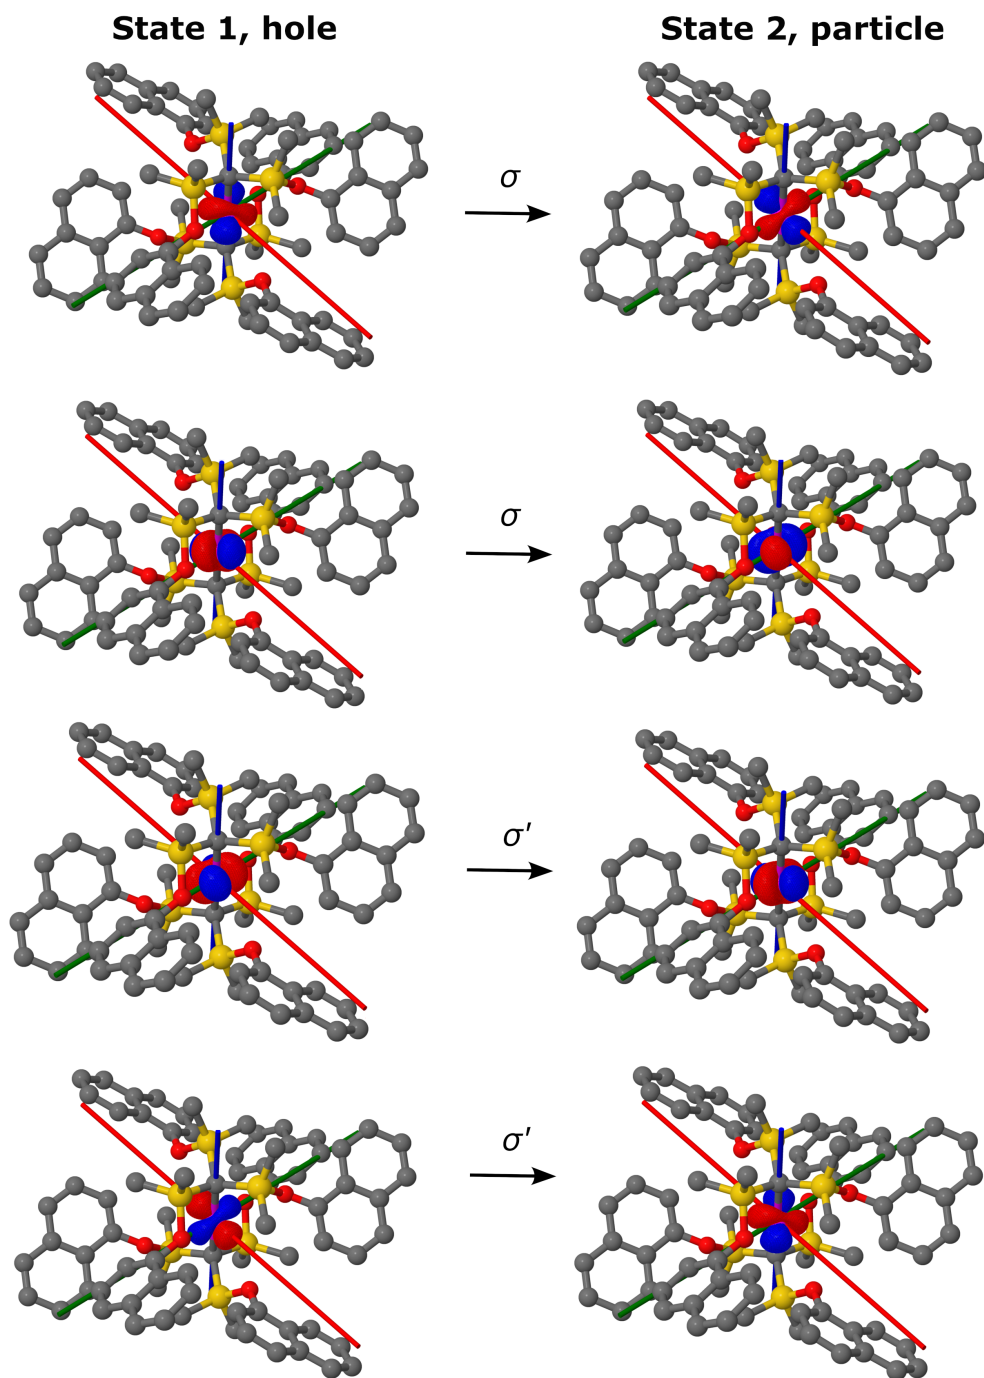

Figure S4: Hole and particle NTOs for SOC between states  $|1\rangle$  and  $|2\rangle$  of  $\text{Co}(\text{C}(\text{SiMe}_2\text{ONaph})_3)_2$  (EOM-EE-CCSD-in-LRC- $\omega$ PBEh/6-31G\*). Singular values are  $\sigma = 0.49$  and  $\sigma' = 0.42$ . Red, green, and blue axes indicate  $x$ ,  $y$ , and  $z$  axes. An isovalue of 0.05 was used.

## 5 Effects of the low-level DFT method

Table S6: Excitation energies  $\Delta E$  (eV) and spin-orbit coupling constants SOCCs ( $\text{cm}^{-1}$ ) of  $[\text{Fe}(\text{H}_2\text{O})_6]^{2+}$  obtained using EOM-EA-CCSD and EOM-EA-CCSD-in-DFT with cc-pVTZ basis set. Excitation energies are computed from states  $|1\rangle, |2\rangle, |3\rangle$  to states  $|4\rangle, |5\rangle$ . SOCCs are computed between states  $|1\rangle$  and  $|2\rangle$ ,  $|1\rangle$  and  $|3\rangle$ , and  $|2\rangle$  and  $|3\rangle$ . EOM-EA-CCSD-in-DFT energies are obtained without truncation of the virtual space.

| EOM-EA-CCSD |      |
|-------------|------|
| $\Delta E$  | 1.35 |
| SOCC        | 282  |

  

| EOM-EA-CCSD-in-DFT |      |                    |       |          |           |                 |
|--------------------|------|--------------------|-------|----------|-----------|-----------------|
|                    | PBE0 | LRC- $\omega$ PBEh | B3LYP | B5050LYP | CAM-B3LYP | $\omega$ B97x-D |
| $\Delta E$         | 1.29 | 1.41               | 0.94  | 0.96     | 0.97      | 1.83            |
| SOCC               | 235  | 242                | 237   | 265      | 250       | 218             |

Table S7: Excitation energies  $\Delta E$  (eV) and spin-orbit coupling constants SOCCs ( $\text{cm}^{-1}$ ) of  $[\text{Fe}(\text{H}_2\text{O})_6]^{3+}$  obtained using EOM-SF-CCSD, EOM-SF-CCSD-in-DFT, and SF-TDDFT with cc-pVTZ basis set. Excitation energies are computed from state  $|1\rangle$  to states  $|2\rangle, |3\rangle, |4\rangle$ . SOCCs are computed between state  $|1\rangle$  and the triply-degenerate excited state (i.e., states  $|2\rangle, |3\rangle, |4\rangle$ ). EOM-SF-CCSD-in-DFT energies are obtained without truncation of the virtual space.

| EOM-SF-CCSD |      |
|-------------|------|
| $\Delta E$  | 2.52 |
| SOCC        | 839  |

  

| EOM-SF-CCSD-in-DFT |      |                    |       |          |           |                 |
|--------------------|------|--------------------|-------|----------|-----------|-----------------|
|                    | PBE0 | LRC- $\omega$ PBEh | B3LYP | B5050LYP | CAM-B3LYP | $\omega$ B97x-D |
| $\Delta E$         | 3.37 | 3.37               | 3.37  | 3.63     | 3.45      | 3.29            |
| SOCC               | 889  | 889                | 878   | 893      | 882       | 895             |

  

| SF-DFT     |      |                    |       |          |           |                 |
|------------|------|--------------------|-------|----------|-----------|-----------------|
|            | PBE0 | LRC- $\omega$ PBEh | B3LYP | B5050LYP | CAM-B3LYP | $\omega$ B97x-D |
| $\Delta E$ | 2.02 | 2.01               | 1.49  | 1.91     | 1.51      | 1.63            |
| SOCC       | 662  | 659                | 665   | 757      | 686       | 685             |

Table S8: Energies of electronic states ( $\text{cm}^{-1}$ ) and spin-orbit coupling constants SOCCs ( $\text{cm}^{-1}$ ) of  $\text{Co}(\text{C}(\text{SiH}_3)_3)_2$  using EOM-EE-CCSD, CD-EE-CC2, and EOM-EE-CCSD-in-DFT with cc-pVTZ. DFT is LRC- $\omega$ PBEh and CAM-B3LYP. EOM-EE-CCSD-in-DFT energies are obtained without truncation of the virtual space. SOCC is between states  $|1\rangle$  and  $|2\rangle$ .

|                          | $\text{Co}(\text{C}(\text{SiH}_3)_3)_2$ |        |                                |                       |
|--------------------------|-----------------------------------------|--------|--------------------------------|-----------------------|
|                          | EOM-CCSD                                | CD-CC2 | EOM-CCSD-in-LRC- $\omega$ PBEh | EOM-CCSD-in-CAM-B3LYP |
| $ 1\rangle$              | 0                                       | 0      | 0                              | 0                     |
| $ 2\rangle$              | 11                                      | 4      | 39                             | 97                    |
| $ 3\rangle$              | 803                                     | 258    | 3287                           | 3193                  |
| $ 4\rangle$              | 803                                     | 261    | 3288                           | 3193                  |
| $ 3'\rangle$             | 1855                                    | 1645   | 3184                           | 3185                  |
| $ 4'\rangle$             | 1855                                    | 1657   | 3184                           | 3185                  |
| $ \text{Ref}_1\rangle$   | 3903                                    | 3690   | 1128                           | 650                   |
| $ \text{Ref}_2\rangle$   | 4427                                    | 4964   | 2412                           | 2597                  |
| $ 5'\rangle$             | 15609                                   | 14911  | 19384                          | 19812                 |
| $ 6'\rangle$             | 15609                                   | 14914  | 19384                          | 19812                 |
| $\langle 1 L_z 2\rangle$ | $2.98i$                                 |        | $3.01i$                        | $3.16i$               |
| SOCC                     | 1126                                    |        | 1107                           | 1162                  |

## 6 Basis set effects

Table S9: Excitation energies  $\Delta E$  (eV) and spin-orbit coupling constants SOCCs ( $\text{cm}^{-1}$ ) of  $[\text{Fe}(\text{H}_2\text{O})_6]^{2+}$  and  $[\text{Fe}(\text{H}_2\text{O})_6]^{3+}$  obtained using EOM-CCSD, EOM-CCSD-in-LRC- $\omega$ PBEh, and CC2 with cc-pVDZ and cc-pVTZ basis sets. SOCC of  $[\text{Fe}(\text{H}_2\text{O})_6]^{2+}$  is between states  $|1\rangle$  and  $|2\rangle$ ,  $|1\rangle$  and  $|3\rangle$ , and  $|2\rangle$  and  $|3\rangle$ . SOCC of  $[\text{Fe}(\text{H}_2\text{O})_6]^{3+}$  is between state  $|1\rangle$  and the triply-degenerate excited state (i.e., states  $|2\rangle$ ,  $|3\rangle$ ,  $|4\rangle$ ). EOM-CCSD-in-DFT energies are obtained with and without (in parenthesis) truncation of the virtual space.

| $[\text{Fe}(\text{H}_2\text{O})_6]^{2+}$ |             |         |         |         |                                   |             |
|------------------------------------------|-------------|---------|---------|---------|-----------------------------------|-------------|
|                                          | EOM-EA-CCSD |         | EA-CC2  |         | EOM-EA-CCSD-in-LRC- $\omega$ PBEh |             |
|                                          | cc-pVDZ     | cc-pVTZ | cc-pVDZ | cc-pVTZ | cc-pVDZ                           | cc-pVTZ     |
| $\Delta E^a$                             | 1.33        | 1.35    | 1.48    | 1.49    | 1.41 (1.51)                       | 1.41 (1.57) |
| SOCC                                     | 278         | 282     |         |         | 233 (242)                         | 242 (252)   |

  

| $[\text{Fe}(\text{H}_2\text{O})_6]^{3+}$ |             |         |         |         |                                   |             |
|------------------------------------------|-------------|---------|---------|---------|-----------------------------------|-------------|
|                                          | EOM-SF-CCSD |         | SF-CC2  |         | EOM-SF-CCSD-in-LRC- $\omega$ PBEh |             |
|                                          | cc-pVDZ     | cc-pVTZ | cc-pVDZ | cc-pVTZ | cc-pVDZ                           | cc-pVTZ     |
| $\Delta E^b$                             | 2.56        | 2.52    | 2.53    | 2.49    | 3.45 (3.45)                       | 3.37 (3.38) |
| SOCC                                     | 828         | 839     |         |         | 877 (877)                         | 890 (890)   |

<sup>a</sup>  $|1\rangle, |2\rangle, |3\rangle \rightarrow |4\rangle, |5\rangle$ . <sup>b</sup>  $|1\rangle \rightarrow |2\rangle, |3\rangle, |4\rangle$ .

Table S10: Energies of electronic states ( $\text{cm}^{-1}$ ) of  $\text{Co}(\text{C}(\text{SiH}_3)_3)_2$  and  $\text{Co}(\text{C}(\text{SiMe}_2\text{ONaph})_3)_2$  computed using EOM-EE-CCSD, CD-EE-CC2, and EOM-EE-CCSD-in-DFT with 6-31G\*, def2-SV(P), and cc-pVTZ basis sets. The density functional is LRC- $\omega$ PBEh. For  $\text{Co}(\text{C}(\text{SiMe}_2\text{ONaph})_3)_2$ , EOM-EE-CCSD-in-DFT results are available for the truncated virtual space only.

|                        | $\text{Co}(\text{C}(\text{SiH}_3)_3)_2$              |         |         |         |                                |         |
|------------------------|------------------------------------------------------|---------|---------|---------|--------------------------------|---------|
|                        | EOM-CCSD                                             |         | CD-CC2  |         | EOM-CCSD-in-LRC- $\omega$ PBEh |         |
|                        | 6-31G*                                               | cc-pVTZ | 6-31G*  | cc-pVTZ | 6-31G*                         | cc-pVTZ |
| $ \text{Ref}_2\rangle$ | 4129                                                 | 4427    | 5473    | 4964    | 2847                           | 2412    |
| $ 1\rangle$            | 0                                                    | 0       | 0       | 0       | 0                              | 0       |
| $ 2\rangle$            | 1                                                    | 10      | 0       | 1       | 0                              | 22      |
| $ 3'\rangle$           | 1102                                                 | 1855    | 866     | 1645    | 2531                           | 3184    |
| $ 4'\rangle$           | 1102                                                 | 1855    | 866     | 1657    | 2532                           | 3184    |
| $ 5'\rangle$           | 14931                                                | 15609   | 14625   | 14911   | 17565                          | 19384   |
| $ 6'\rangle$           | 14930                                                | 15609   | 14625   | 14914   | 17564                          | 19384   |
|                        | $\text{Co}(\text{C}(\text{SiMe}_2\text{ONaph})_3)_2$ |         |         |         |                                |         |
|                        | EOM-CCSD-in-LRC- $\omega$ PBEh                       |         |         |         |                                |         |
|                        | 6-31G*                                               |         | cc-pVTZ |         |                                |         |
| $ \text{Ref}_2\rangle$ | 2492                                                 |         | 1778    |         |                                |         |
| $ 1\rangle$            | 0                                                    |         | 0       |         |                                |         |
| $ 2\rangle$            | 45                                                   |         | 15      |         |                                |         |
| $ 3'\rangle$           | 2721                                                 |         | 3110    |         |                                |         |
| $ 4'\rangle$           | 2722                                                 |         | 3111    |         |                                |         |
| $ 5'\rangle$           | 19180                                                |         | 20252   |         |                                |         |
| $ 6'\rangle$           | 19184                                                |         | 20255   |         |                                |         |

## 7 Comparison with additional benchmark data

Table S11: Energies of electronic states ( $\text{cm}^{-1}$ ), spin-orbit coupling constants SOCCs ( $\text{cm}^{-1}$ ), and spin-inversion energy barriers  $U$  ( $\text{cm}^{-1}$ ) of  $\text{Co}(\text{C}(\text{SiH}_3)_3)_2$  and  $\text{Co}(\text{C}(\text{SiMe}_2\text{ONaph})_3)_2$  computed using EOM-EE-CCSD, CD-EE-CC2, and EOM-EE-CCSD-in-DFT with *cc-pVTZ*. The density functional is LRC- $\omega$ PBEh. EOM-EE-CCSD-in-DFT energies are obtained with truncation of the virtual space. SOCC is for the doubly-degenerate ground state (i.e.,  $|1\rangle$  and  $|2\rangle$ ). NEVPT2 energies are taken from Ref. [2].

|                          | $\text{Co}(\text{C}(\text{SiH}_3)_3)_2$ |                     |                              | $\text{Co}(\text{C}(\text{SiMe}_2\text{ONaph})_3)_2$ |        |
|--------------------------|-----------------------------------------|---------------------|------------------------------|------------------------------------------------------|--------|
|                          | EOM-CCSD <sup>a</sup>                   | CD-CC2 <sup>a</sup> | EOM-CCSD-in-DFT <sup>a</sup> | EOM-CCSD-in-DFT <sup>b</sup>                         | NEVPT2 |
| $ 1\rangle$              | 0                                       | 0                   | 0                            | 0                                                    | 0      |
| $ 2\rangle$              | 11                                      | 4                   | 46                           | 20                                                   | 53     |
| $ 3\rangle$              | 803                                     | 258                 | 3225                         | 3556                                                 | 2768   |
| $ 4\rangle$              | 803                                     | 261                 | 3226                         | 3556                                                 | 2768   |
| $ 3'\rangle$             | 1855                                    | 1645                | 3187                         | 2721                                                 | 2014   |
| $ 4'\rangle$             | 1855                                    | 1657                | 3187                         | 2722                                                 | 2014   |
| $ \text{Ref}_1\rangle$   | 3903                                    | 3690                | 1009                         | 4489                                                 | 13537  |
| $ \text{Ref}_2\rangle$   | 4427                                    | 4964                | 2400                         | 2492                                                 | 1500   |
| $ 5'\rangle$             | 15609                                   | 14911               | 19406                        | 19180                                                | 18865  |
| $ 6'\rangle$             | 15609                                   | 14914               | 19407                        | 19184                                                | 18865  |
| $\langle 1 L_z 2\rangle$ | 2.98 <i>i</i>                           |                     | 3.02 <i>i</i>                | 2.99 <i>i</i>                                        |        |
| SOCC                     | 1126                                    |                     | 1114                         | 1050                                                 |        |
| $U$                      | 504                                     |                     | 497                          | 469                                                  | 476    |

<sup>a</sup> *cc-pVTZ* basis set. <sup>b</sup> 6-31G\* basis set.

Table S12: Spin-orbit splitting of the doubly-degenerate ground state ( $|1\rangle$  and  $|2\rangle$ ) of  $\text{Co}(\text{C}(\text{SiH}_3)_3)_2$  and  $\text{Co}(\text{C}(\text{SiMe}_2\text{ONaph})_3)_2$ . Energies of the sublevels are in  $\text{cm}^{-1}$ . EOM-EE-CCSD-in-LRC- $\omega$ PBEh/*cc-pVTZ* energies are obtained with truncation of the virtual space. NEVPT2 energies are taken from Ref. [2].

|                 | $\text{Co}(\text{C}(\text{SiH}_3)_3)_2$ |                              | $\text{Co}(\text{C}(\text{SiMe}_2\text{ONaph})_3)_2$ |        |
|-----------------|-----------------------------------------|------------------------------|------------------------------------------------------|--------|
|                 | EOM-CCSD <sup>a</sup>                   | EOM-CCSD-in-DFT <sup>a</sup> | EOM-CCSD-in-DFT <sup>b</sup>                         | NEVPT2 |
| $M_J = \pm 9/2$ | 0                                       | 0                            | 0                                                    | 0      |
| $M_J = \pm 7/2$ | 504                                     | 497                          | 469                                                  | 476    |
| $M_J = \pm 5/2$ | 1007                                    | 997                          | 941                                                  | 969    |
| $M_J = \pm 3/2$ | 1511                                    | 1495                         | 1410                                                 | 1469   |

<sup>a</sup> *cc-pVTZ* basis set. <sup>b</sup> 6-31G\* basis set.

## References

- [1] M. Head-Gordon. Characterizing unpaired electrons from the one-particle density matrix. *Chem. Phys. Lett.*, 372:508–511, 2003.
- [2] P. C. Bunting, M. Atanasov, E. Damgaard-Møller, M. Perfetti, I. Crassee, M. Orlita, J. Overgaard, J. van Slageren, F. Neese, and J. R. Long. A linear cobalt(II) complex with maximal orbital angular momentum from a non-Aufbau ground state. *Science*, 362(6421):2146–2149, 2018.

## Relevant Cartesian coordinates

\$comment

[Fe(H2O)6]<sup>3+</sup>, wB97X-D/cc-pVDZ (C1)

\$end

\$molecule

|    |               |               |               |
|----|---------------|---------------|---------------|
| Fe | 0.0002361677  | 0.0000476251  | 0.0009397389  |
| O  | -0.0721189257 | 0.0489498845  | -2.0388231562 |
| O  | 0.0737598235  | -0.0476929346 | 2.0414469592  |
| O  | 0.0549164873  | 2.0401098023  | 0.0486304137  |
| O  | -2.0389792585 | 0.0524780849  | 0.0756714441  |
| O  | -0.0547818719 | -2.0400529569 | -0.0453185578 |
| O  | 2.0396533543  | -0.0528612399 | -0.0711812427 |
| H  | -2.6462604464 | -0.7138298032 | 0.0788015817  |
| H  | -2.6044271001 | 0.8490518214  | 0.1192386544  |
| H  | 2.6050615147  | -0.8495994235 | -0.1120905241 |
| H  | 2.6470815104  | 0.7133260007  | -0.0744189591 |
| H  | 0.8765686589  | -0.0851726048 | 2.5983947722  |
| H  | -0.6854593633 | -0.0421063530 | 2.6574324088  |
| H  | 0.6876662666  | 0.0432232602  | -2.6541932271 |
| H  | -0.8746082195 | 0.0843400673  | -2.5964555133 |
| H  | 0.0983430455  | 2.6073634271  | 0.8439219965  |
| H  | 0.0421180234  | 2.6460438162  | -0.7186352159 |
| H  | -0.0445481784 | -2.6456058663 | 0.7222890300  |
| H  | -0.0952794885 | -2.6077686075 | -0.8404376031 |

\$end

\$comment

[Fe(H2O)6]<sup>3+</sup>, wB97X-D/cc-pVDZ (D2h)

\$end

\$molecule

|    |               |               |               |
|----|---------------|---------------|---------------|
| Fe | 0.0000000000  | 0.0000000000  | 0.0000000000  |
| O  | 0.0000000000  | 0.0000000000  | 2.0417922000  |
| O  | 0.0000000000  | -2.0417922000 | 0.0000000000  |
| O  | 2.0417922000  | 0.0000000000  | 0.0000000000  |
| O  | 0.0000000000  | 2.0417922000  | 0.0000000000  |
| O  | 0.0000000000  | 0.0000000000  | -2.0417922000 |
| O  | -2.0417922000 | 0.0000000000  | 0.0000000000  |
| H  | 0.0000000000  | 0.7819742000  | 2.6288140000  |
| H  | 0.0000000000  | -0.7819742000 | 2.6288140000  |
| H  | 2.6288140000  | 0.0000000000  | 0.7819742000  |
| H  | 2.6288140000  | 0.0000000000  | -0.7819742000 |
| H  | 0.7819742000  | 2.6288140000  | 0.0000000000  |
| H  | -0.7819742000 | 2.6288140000  | 0.0000000000  |



|   |               |               |               |
|---|---------------|---------------|---------------|
| H | 0.0000000000  | -0.7819742000 | -2.6288140000 |
| H | 0.0000000000  | 0.7819742000  | -2.6288140000 |
| H | -2.6288140000 | 0.0000000000  | -0.7819742000 |
| H | -2.6288140000 | 0.0000000000  | 0.7819742000  |
| H | -0.7819742000 | -2.6288140000 | 0.0000000000  |
| H | 0.7819742000  | -2.6288140000 | 0.0000000000  |

\$end

\$comment

Co(C(SiH3)3)2, wB97X-D/cc-pVDZ (C2h)

\$end

\$molecule

|    |               |               |               |
|----|---------------|---------------|---------------|
| Co | -0.0000000000 | 0.0000000000  | -0.0000000000 |
| C  | -1.9836800000 | 0.0000028832  | -0.0000000000 |
| C  | 1.9836800000  | -0.0000028832 | -0.0000000000 |
| Si | 2.5504386917  | -0.9001237071 | -1.5590600000 |
| Si | 2.5504386917  | -0.9001237070 | 1.5590600000  |
| Si | 2.5504426166  | 1.8002462930  | -0.0000000000 |
| Si | -2.5504426166 | -1.8002462930 | 0.0000000000  |
| Si | -2.5504386917 | 0.9001237070  | -1.5590600000 |
| Si | -2.5504386917 | 0.9001237071  | 1.5590600000  |
| H  | 2.0227666497  | -2.3050229401 | -1.5678500000 |
| H  | 4.0443285993  | -0.9636558784 | -1.6691000000 |
| H  | 2.0227697016  | -0.2052929401 | -2.7801300000 |
| H  | 2.0227666497  | -2.3050229400 | 1.5678500000  |
| H  | 2.0227697016  | -0.2052929400 | 2.7801300000  |
| H  | 4.0443285993  | -0.9636558783 | 1.6691000000  |
| H  | 2.0227736487  | 2.5103070600  | 1.2122800000  |
| H  | 2.0227736487  | 2.5103070599  | -1.2122800000 |
| H  | 4.0443328013  | 1.9273041216  | -0.0000000000 |
| H  | -2.0227736487 | -2.5103070600 | -1.2122800000 |
| H  | -4.0443328013 | -1.9273041216 | 0.0000000000  |
| H  | -2.0227736487 | -2.5103070599 | 1.2122800000  |
| H  | -2.0227697016 | 0.2052929400  | -2.7801300000 |
| H  | -2.0227666497 | 2.3050229400  | -1.5678500000 |
| H  | -4.0443285993 | 0.9636558783  | -1.6691000000 |
| H  | -2.0227697016 | 0.2052929401  | 2.7801300000  |
| H  | -4.0443285993 | 0.9636558784  | 1.6691000000  |
| H  | -2.0227666497 | 2.3050229401  | 1.56785000001 |

\$end
