# Supplementary material for: Coupled-cluster treatment of complex open-shell systems: the case of single-molecule magnets
Source: PubMed Central journal article supplement (PMC11186456; doi:10.1039/d4cp01129e), 2024-05-27

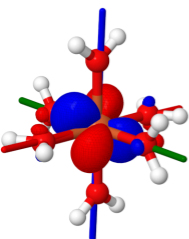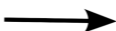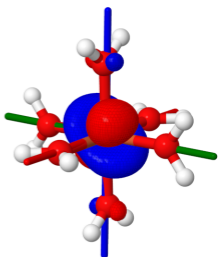

State 1, hole

State 3, particle

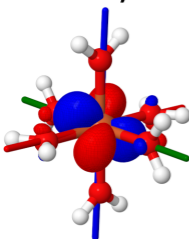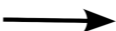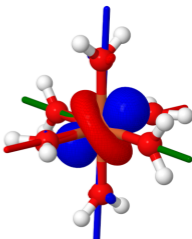

State 2, hole

State 3, particle

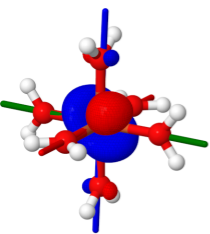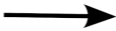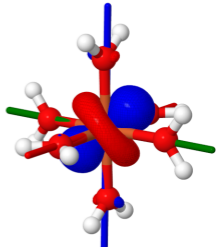

State 4, hole

State 5, particle

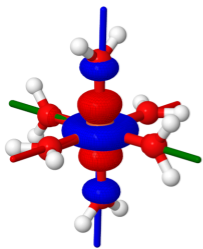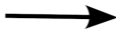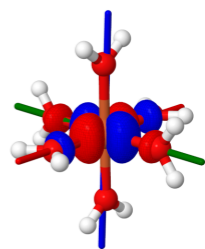

Supplement: CP-026-D4CP01129E-s003.pdf [file CP-026-D4CP01129E-s003.pdf]
