# Supplementary material for: Coupled-cluster treatment of complex open-shell systems: the case of single-molecule magnets
Source: Royal Society of Chemistry journal article supplement (doi:10.1039/d4cp01129e), 2024-01-01

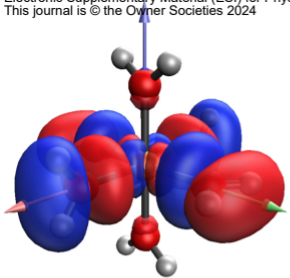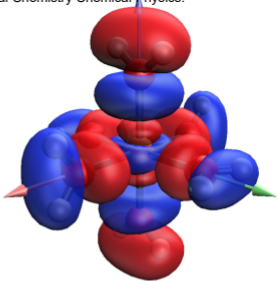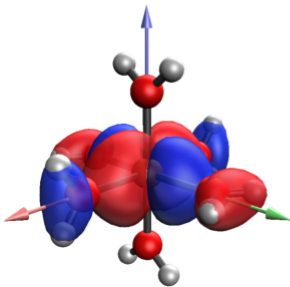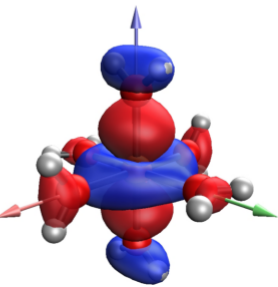

Supplement: d4cp01129e4.pdf [file d4cp01129e4.pdf]
